# Supplementary material
Source: PubMed Central journal article supplement (PMC1180786)
Supplement: pnas_0504099102_6.pdf [file pnas_0504099102_6.pdf]

Table 5. Parameter estimates for the model with  $J_{\text{NCX}} = \text{ef} \cdot f_{\text{allosteric}}(\mathbf{Ca}) \cdot f_{\text{electrochemical}}(\mathbf{Ca}, \mathbf{V})$  in the three cases: 1-s single pulse experiment of figure 2A in ref. 1, 4-s step plus 1-s pulse adaptation experiment of figure 5A–D in ref. 1, and 60-s prolonged stimulation experiment of figure 7A in ref. 2

| <i>Parameter</i> | <i>Single-Pulse<br/>Stimulation</i> | <i>Step-Pulse<br/>Adaptation</i> | <i>Prolonged<br/>Stimulation</i>   |
|------------------|-------------------------------------|----------------------------------|------------------------------------|
| cap              | $7.872 \times 10^{-3}$              | $6.241 \times 10^{-4}$           | $1.275 \times 10^{-3}$             |
| cc1lin           | 0.4365                              | 0.3975                           | 0.4408                             |
| cc2              | 35.54                               | 6.357                            | 7.327                              |
| ck1lin           | 8.615                               | 8.786                            | 5.935                              |
| ck2              | 1.129                               | 0.2109                           | 0.7679                             |
| clmax            | 0.8028                              | 0.7566                           | 0.8705                             |
| cnmax            | 0.7672                              | 0.2148                           | 0.7577                             |
| ef               | 2.739                               | 51.08                            | 4.579                              |
| Fvol             | 0.04071                             | 0.02308                          | 0.02841                            |
| gl               | 7.252                               | 6.156                            | 9.786                              |
| hmc <sub>1</sub> | 0.2379                              | 0.9445                           | 1.019                              |
| hmc <sub>2</sub> | 8.905                               | 1.288                            | 6.035                              |
| inf              | 4.147                               | 2.974                            | 4.076                              |
| inhmax           | 3.154                               | 5.00                             | 2.891                              |
| k1               | 0.00343                             | 0.1218                           | 0.008969                           |
| k2               | 25.30                               | 12.56                            | 27.45                              |
| kinh             | 0.08441                             | 1.113                            | 0.07165                            |
| kinhcn           | 0.983                               | 0.7247                           | 0.8193                             |
| kncx             | 4.986                               | 8.469                            | 6.268                              |
| k <sub>sat</sub> | 0.01031                             | 0.0129                           | 0.009469                           |
| n <sub>1</sub>   | 2.064                               | 1.958                            | 3.910                              |
| n <sub>2</sub>   | 1.517                               | 2.314                            | 1.463                              |
| ninh             | 4.441                               | 1.426                            | 23.30                              |
| ninhcn           | 0.7167                              | 1.552                            | 0.8141                             |
| nncx             | 1.074                               | 0.9809                           | 0.987                              |
| pd               | 2.295                               | 16.22                            | 1.395                              |
| r1               | 9.621                               | 12.37                            | 8.901                              |
| r2               | 5.295                               | 3.147                            | 6.475                              |
| smax             | 50.15                               | 51.02                            | 20.02                              |
| vcl              | -14.3                               | -4.329                           | -5.674                             |
| vcng             | 0.01017                             | 0.008681                         | 0.009768                           |
| vl               | -83.23                              | -63.76                           | -52.8                              |
| $\alpha$         | 0.09571                             | 0.04497                          | 0.08095                            |
| $\gamma$         | 1.009                               | 12.9                             | 3.384                              |
| $\nu$            | 0.05451                             | 0.06632                          | 0.01981                            |
| -Log-likelihood  | $1.053 \times 10^3$                 | $-2.130 \times 10^2$             | $3.808 \times 10^2$<br>(penalized) |

1. Reisert, J. & Matthews, H. R. (1999) *J. Physiol. (London)* **519**, 801–813.
2. Reisert, J. & Matthews, H. R. (2001) *J. Physiol. (London)* **534**, 179–191.
