# Supplementary material
Source: PubMed Central journal article supplement (PMC1180786)

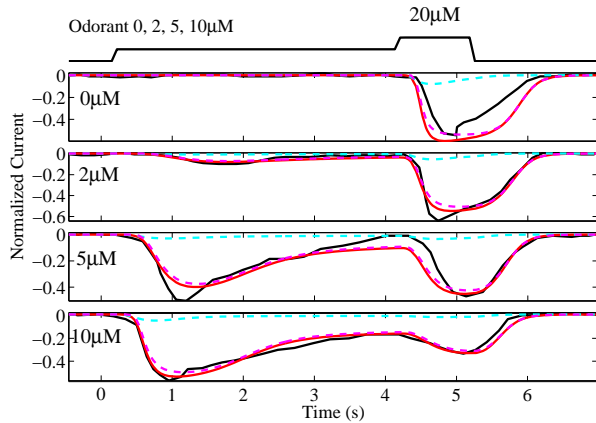

A)

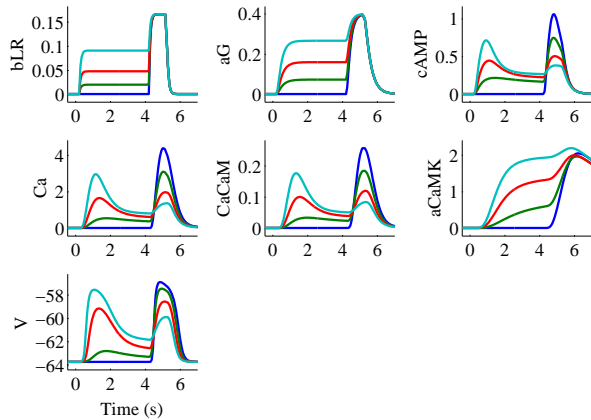

B)

Supplement: pnas_0504099102_10.pdf [file pnas_0504099102_10.pdf]
